# Supplementary material for: Optimization of Extraction and HPLC–MS/MS Profiling of Phenolic Compounds from Red Grape Seed Extracts Using Conventional and Deep Eutectic Solvents
Source: MDPI journal article supplement (doi:10.3390/antiox11081595), 2022-08-18
Supplement: s1 [file s1]

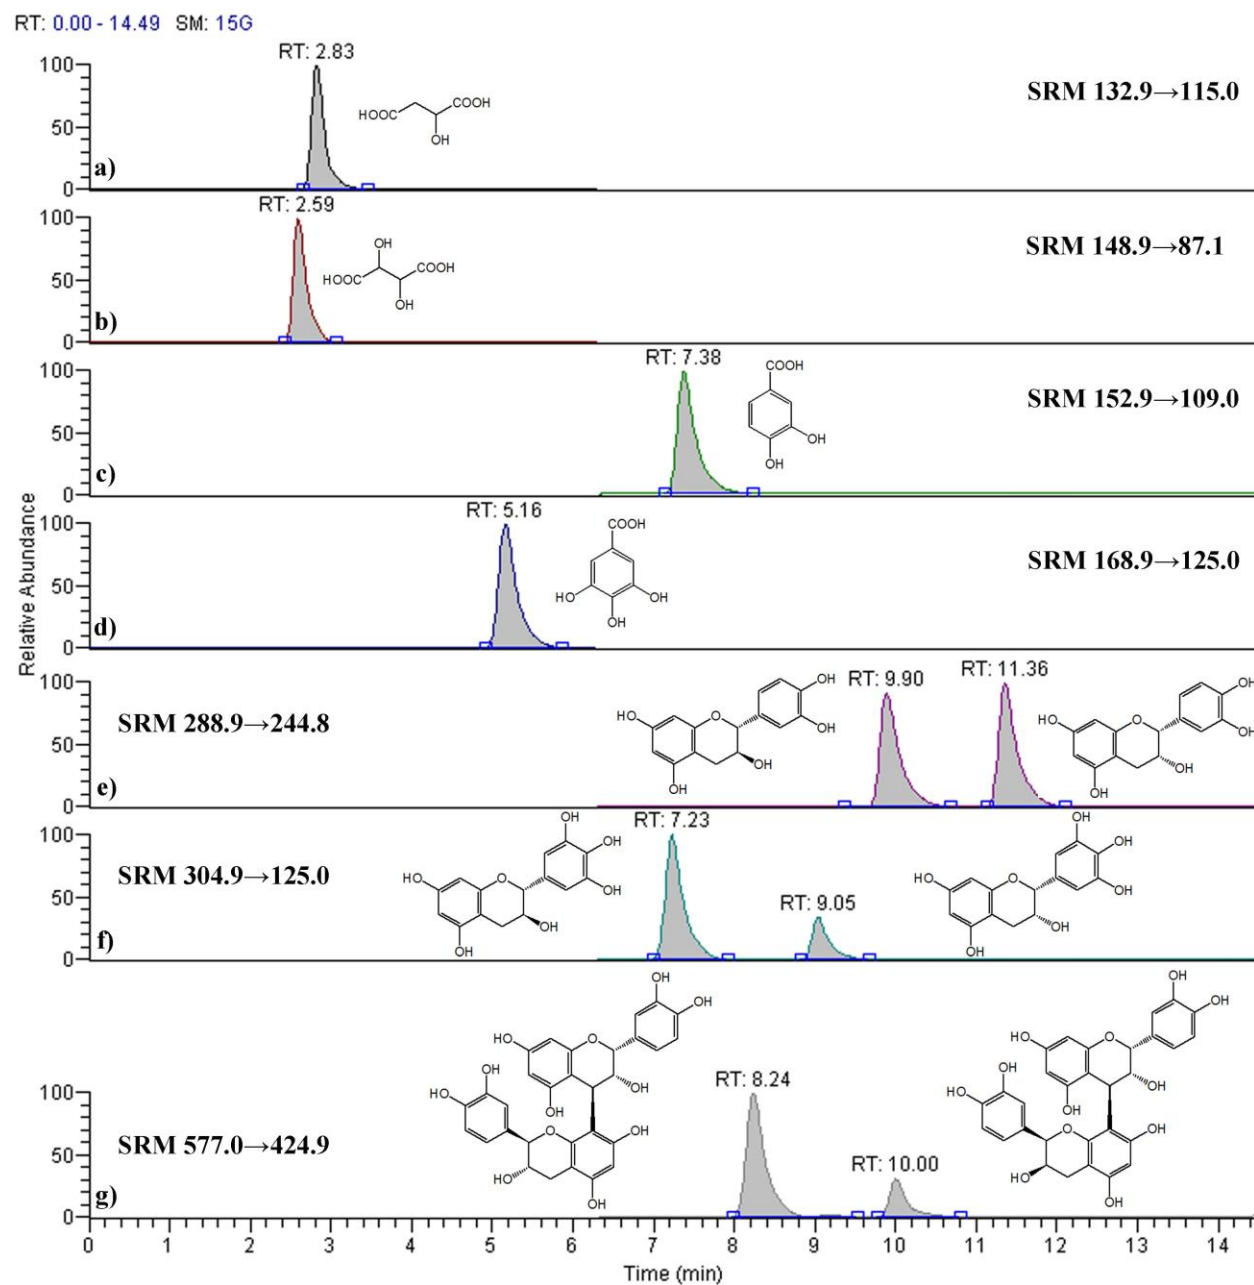

**Figure S2.** HPLC-MS/MS chromatograms

a) Malic acid; b) Tartaric acid; c) Protocatechuic acid; c) Gallic acid; d) (+)-Catechin and (-)-Epicatechin; e) Gallocatechin and Epigallocatechin; g) Procyanidin B1 and Procyanidin B2

Legend: RT – retention time; SRM - selective reaction monitoring
