# Supplementary material for: Optimization of Extraction and HPLC–MS/MS Profiling of Phenolic Compounds from Red Grape Seed Extracts Using Conventional and Deep Eutectic Solvents
Source: MDPI journal article supplement (doi:10.3390/antiox11081595), 2022-08-18
Supplement: s1 [file s1]

**Table S1.** HPLC-MS/MS acquisition parameters used for the analysis of phenol compounds in Grape Seed Extracts (GSEs).

| Compound            | Abbrev. | Formula                                         | Retention<br>time<br>(min) | [M-H] <sup>-</sup><br>Experimental<br>( <i>m/z</i> ) | MS/MS<br>Fragment | Collision<br>Energy<br>(V) |
|---------------------|---------|-------------------------------------------------|----------------------------|------------------------------------------------------|-------------------|----------------------------|
| Tartaric acid       | TA      | C <sub>4</sub> H <sub>6</sub> O <sub>6</sub>    | 2.59                       | 148.9                                                | 103.1             | 13                         |
| Malic acid          | MA      | C <sub>4</sub> H <sub>6</sub> O <sub>5</sub>    | 2.83                       | 132.9                                                | 115.0             | 14                         |
| Gallic acid         | GA      | C <sub>7</sub> H <sub>6</sub> O <sub>5</sub>    | 5.16                       | 168.9                                                | 125.0             | 16                         |
| Galocatechin        | GC      | C <sub>15</sub> H <sub>14</sub> O <sub>7</sub>  | 7.23                       | 304.8                                                | 124.9             | 21                         |
| Protocatechuic acid | PA      | C <sub>7</sub> H <sub>6</sub> O <sub>4</sub>    | 7.38                       | 152.9                                                | 109.0             | 14                         |
| Procyanidin B1      | PB1     | C <sub>30</sub> H <sub>26</sub> O <sub>12</sub> | 8.24                       | 577.0                                                | 288.8             | 27                         |
| Epigallocatechin    | EGC     | C <sub>15</sub> H <sub>14</sub> O <sub>7</sub>  | 9.05                       | 304.9                                                | 125.0             | 25                         |
| (+) Catechin        | C       | C <sub>15</sub> H <sub>14</sub> O <sub>6</sub>  | 9.90                       | 288.9                                                | 244.8             | 18                         |
| Procyanidin B2      | PB2     | C <sub>30</sub> H <sub>26</sub> O <sub>12</sub> | 10.00                      | 577.0                                                | 288.8             | 27                         |
| (-) Epicatechin     | EC      | C <sub>15</sub> H <sub>14</sub> O <sub>6</sub>  | 11.36                      | 288.9                                                | 244.9             | 17                         |
