# Supplementary figures and images for: Optimization of Extraction and HPLC–MS/MS Profiling of Phenolic Compounds from Red Grape Seed Extracts Using Conventional and Deep Eutectic Solvents
Source: MDPI journal article supplement (doi:10.3390/antiox11081595), 2022-08-18

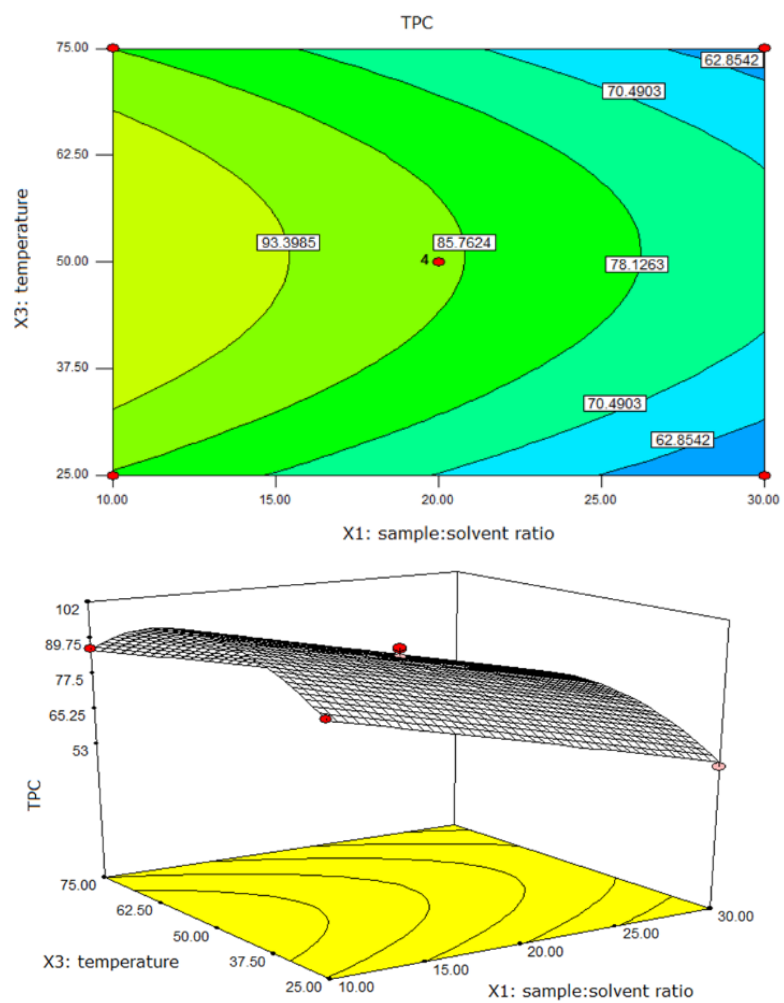

**Figure S1.** Contour plot (A); three-dimensional (3D) response surface (B)

Supplement: s1 [file s1]
